# Supplementary material for: An effective antimicrobial complex of nanoscale β-cyclodextrin and ciprofloxacin conjugated to a cell adhesive dipeptide
Source: Royal Society of Chemistry journal article supplement (doi:10.1039/d2ra05822g), 2022-01-01
Supplement: d2ra05822g1.pdf [file d2ra05822g1.pdf]

## An Effective Antimicrobial Complex of Nanoscale $\beta$ -cyclodextrin and Ciprofloxacin Conjugated to a Cell Adhesive Dipeptide

Reza Taheri-Ledari<sup>1</sup>, Farinaz Jalali<sup>1</sup>, Leili Heidari<sup>1,2</sup>, Fatemeh Ganjali<sup>1</sup>, Fereshteh Rasouli Asl<sup>1</sup>, Simindokht Zarei-Shokat<sup>1</sup>, Mohadeseh Forouzandeh-Malati<sup>1</sup>, Adibeh Mohammadi, Ali Maleki<sup>1,\*</sup>

<sup>1</sup> Catalysts and Organic Synthesis Research Laboratory, Department of Chemistry, Iran University of Science and Technology, Tehran 16846-13114, Iran

<sup>2</sup> Department of Chemistry, Faculty of Basic Sciences, Ilam University, P. O. Box 69315-516, Ilam, Iran.

\*Corresponding author. E-mail addresses: [maleki@iust.ac.ir](mailto:maleki@iust.ac.ir) (A. Maleki).

### Table of Content

| Content                                                                                | Pages |
|----------------------------------------------------------------------------------------|-------|
| <b>Figure S1.</b> <sup>1</sup> H-NMR spectrum of Cys-Arg (CR) dipeptide structure.     | S2    |
| <b>Figure S2.</b> <sup>1</sup> H-NMR spectrum of the neat B-CD.                        | S3    |
| <b>Figure S3.</b> <sup>1</sup> H-NMR spectrum of B-CD-MPS.                             | S4    |
| Interpretations of the NMR spectrum of of B-CD-MPS.                                    | S5    |
| <b>Figure S4.</b> <sup>1</sup> H-NMR spectrum of CPFY/B-CD-MPS.                        | S6    |
| <b>Figure S5.</b> <sup>1</sup> H-NMR spectrum of CPFY/B-CD-MPS (expanded 0.6-4.0 ppm). | S7    |
| <b>Figure S6.</b> <sup>1</sup> H-NMR spectrum of CPFY/B-CD-MPS (expanded 4.0-9.0 ppm). | S8    |
| <b>Figure S7.</b> <sup>1</sup> H-NMR spectrum of CPFY/B-CD-CR.                         | S9    |
| <b>Figure S8.</b> <sup>1</sup> H-NMR spectrum of CPFY/B-CD-CR (expanded 4.6-9.0 ppm).  | S10   |
| <b>NOTE</b>                                                                            | S11   |

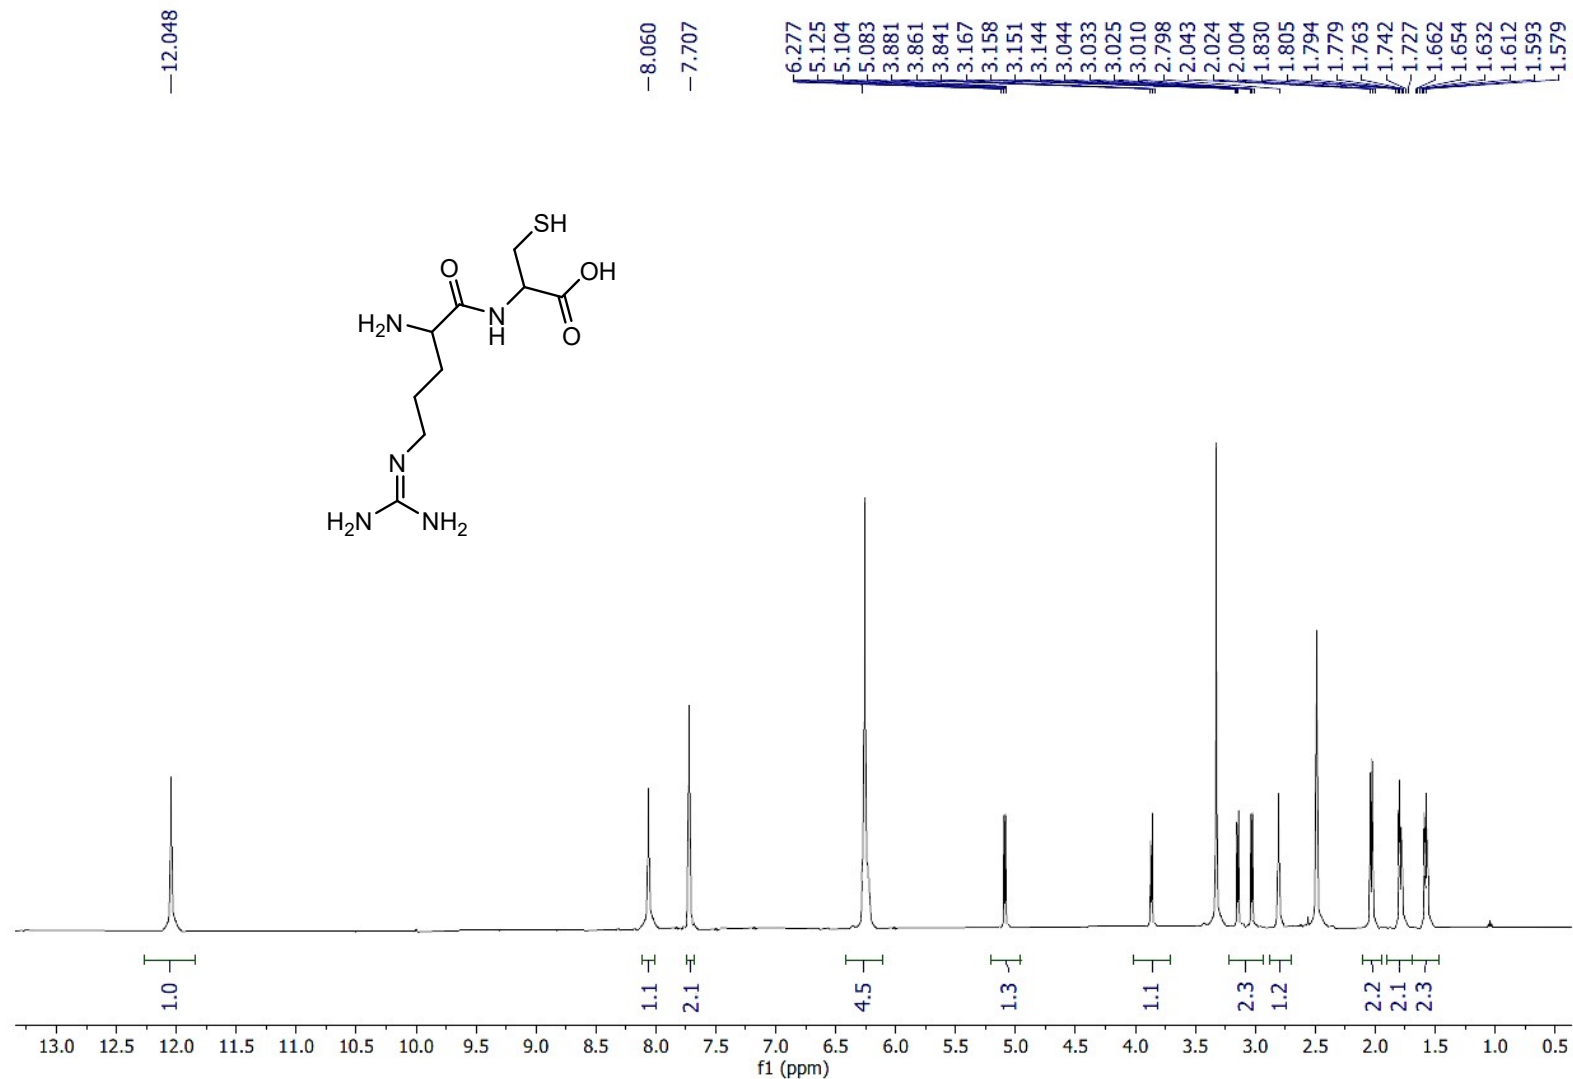

**Figure S1.** <sup>1</sup>H-NMR spectrum of Cys-Arg (CR) dipeptide structure.

Spectral data of CR dipeptide structure:

<sup>1</sup>H NMR (500 MHz, DMSO):  $\delta$  = 1.58-1.66 (m, 2H, CH<sub>2</sub>), 1.73-1.83 (m, 2H, CH<sub>2</sub>), 2.02 (t, 2H,  $J$  = 10 Hz, CH<sub>2</sub>), 2.79 (s, 1H, SH), 3.01-3.17 (m, 2H, CH<sub>2</sub>), 3.86 (t, 1H,  $J$  = 10 Hz, CH), 5.10 (t, 1H,  $J$  = 10.5 Hz, CH), 6.28 (s, 4H, NH<sub>2</sub>), 7.71 (s, 2H, NH<sub>2</sub>), 8.06 (s, 1H, NH).

## Supporting Information

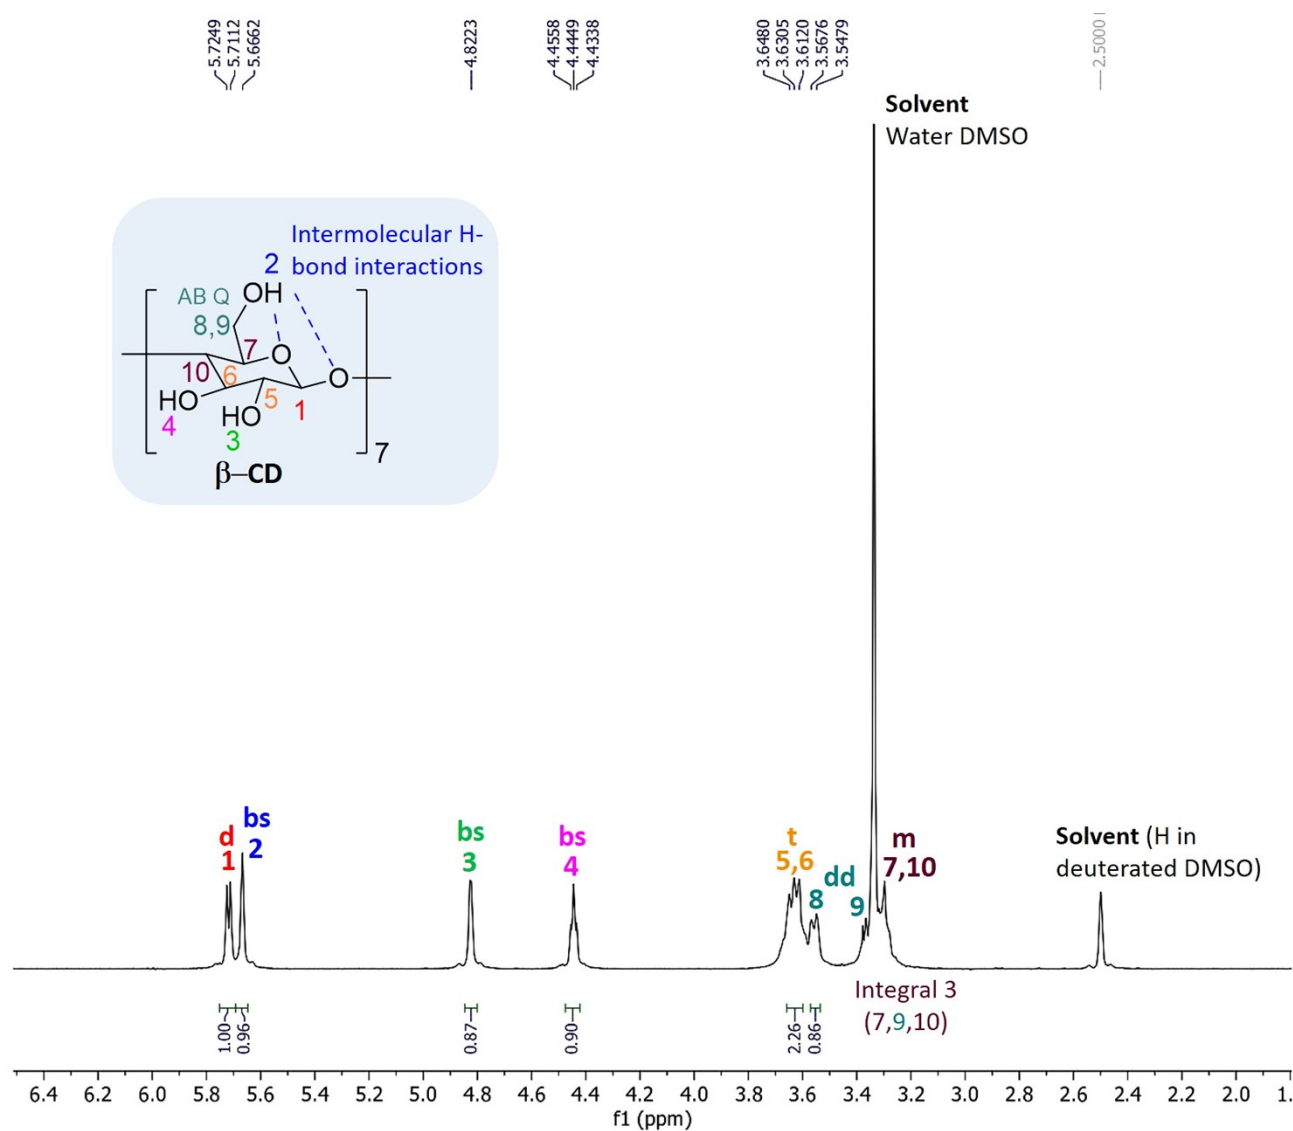

**Figure S2.** <sup>1</sup>H-NMR spectrum of the neat B-CD.

Spectral data of the neat B-CD:

<sup>1</sup>H NMR (500 MHz, DMSO):  $\delta$  = 3.25-3.35 (m, 2H, CH), 3.37 (dd, 1H,  $J_1$  = 9.8 Hz,  $J_2$  = 31.4 Hz, CH<sub>2</sub>OH), 3.55 (dd, 1H,  $J$  = 9.8 Hz,  $J_2$  = 31.4 Hz, CH<sub>2</sub>OH), 3.63 (t, 2H, CHOH), 4.44 (bs, 1H, CHOH), 4.82 (bs, 1H, CHOH), 5.66 (bs, 1H, CH<sub>2</sub>OH), 5.71 (d, 1H,  $J$  = 6.8 Hz, CHO<sub>2</sub>).

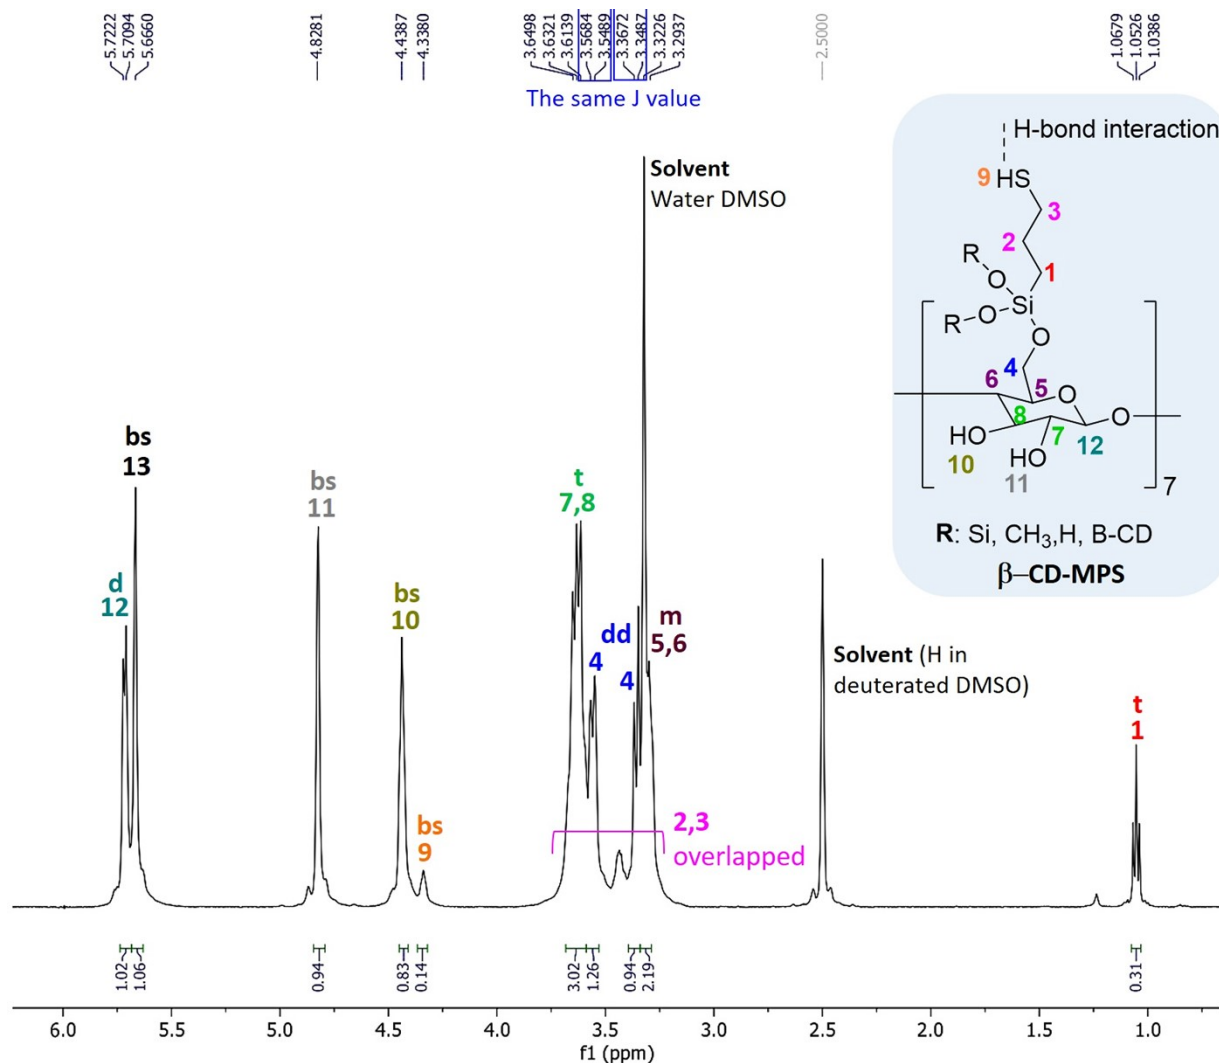

**Figure S3.** <sup>1</sup>H-NMR spectrum of B-CD-MPS.

Spectral data of B-CD-MPS:

<sup>1</sup>H NMR (500 MHz, DMSO):  $\delta$  = 1.05 (t, 2H,  $J$  = 7.6 Hz, SiCH<sub>2</sub>), 3.25-3.32 (m, 14H, CH), 3.35 (dd, 7H,  $J_1$  = 9.2 Hz,  $J_2$  = 100.6 Hz, CH<sub>2</sub>OSi), 3.55 (dd, 7H,  $J_1$  = 9.2 Hz,  $J_2$  = 100.6 Hz, CH<sub>2</sub>OSi), 3.63 (t, 21H,  $J$  = 8.8 Hz, CHOH and SiOH), 4.33 (bs, 1H, SH), 4.43 (bs, 7H, CHOH), 4.82 (bs, 7H, CHOH), 5.66 (bs, 7H, CH<sub>2</sub>OH), 5.71 (d, 7H,  $J$  = 6.4 Hz, CHO<sub>2</sub>). All integral values are multiplied by 7.

## Interpretations of the NMR spectrum of of B-CD-MPS:

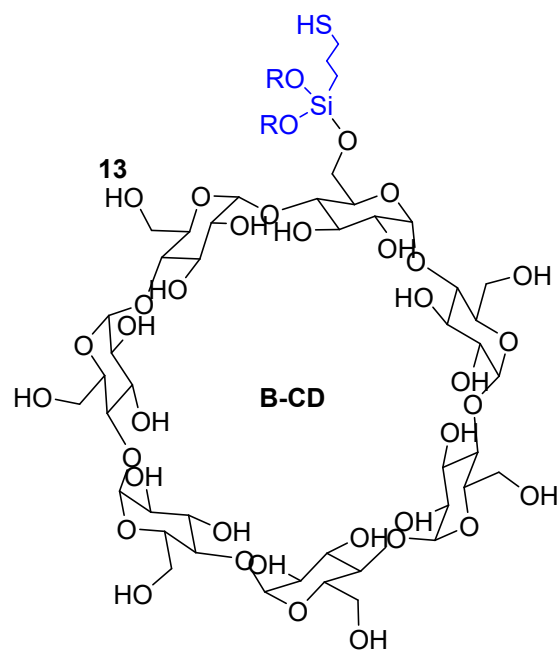

From integral values: It seems that all 7 rings of B-CD are not modified by MPS. In other words, only one ring is modified by MPS. For **1** (methylene next to the Si);  $0.31 \times 7 \sim 2$  protons so, while for other integral values, e.g. proton **12**,  $1.02 \times 7 \sim 7$  protons, which is correct in a 7-ring B-CD monomer. In the same line, for S-H (assigned as **9**);  $0.14 \times 7 = 0.96 \sim 1$  proton. For R-O-Si groups; the presence of Si-O-Si band is confirmed by FTIR (Figure 1b). Also, one proton is excess in the integral 3.02, which can be assigned to the possible formation of SiO-H.

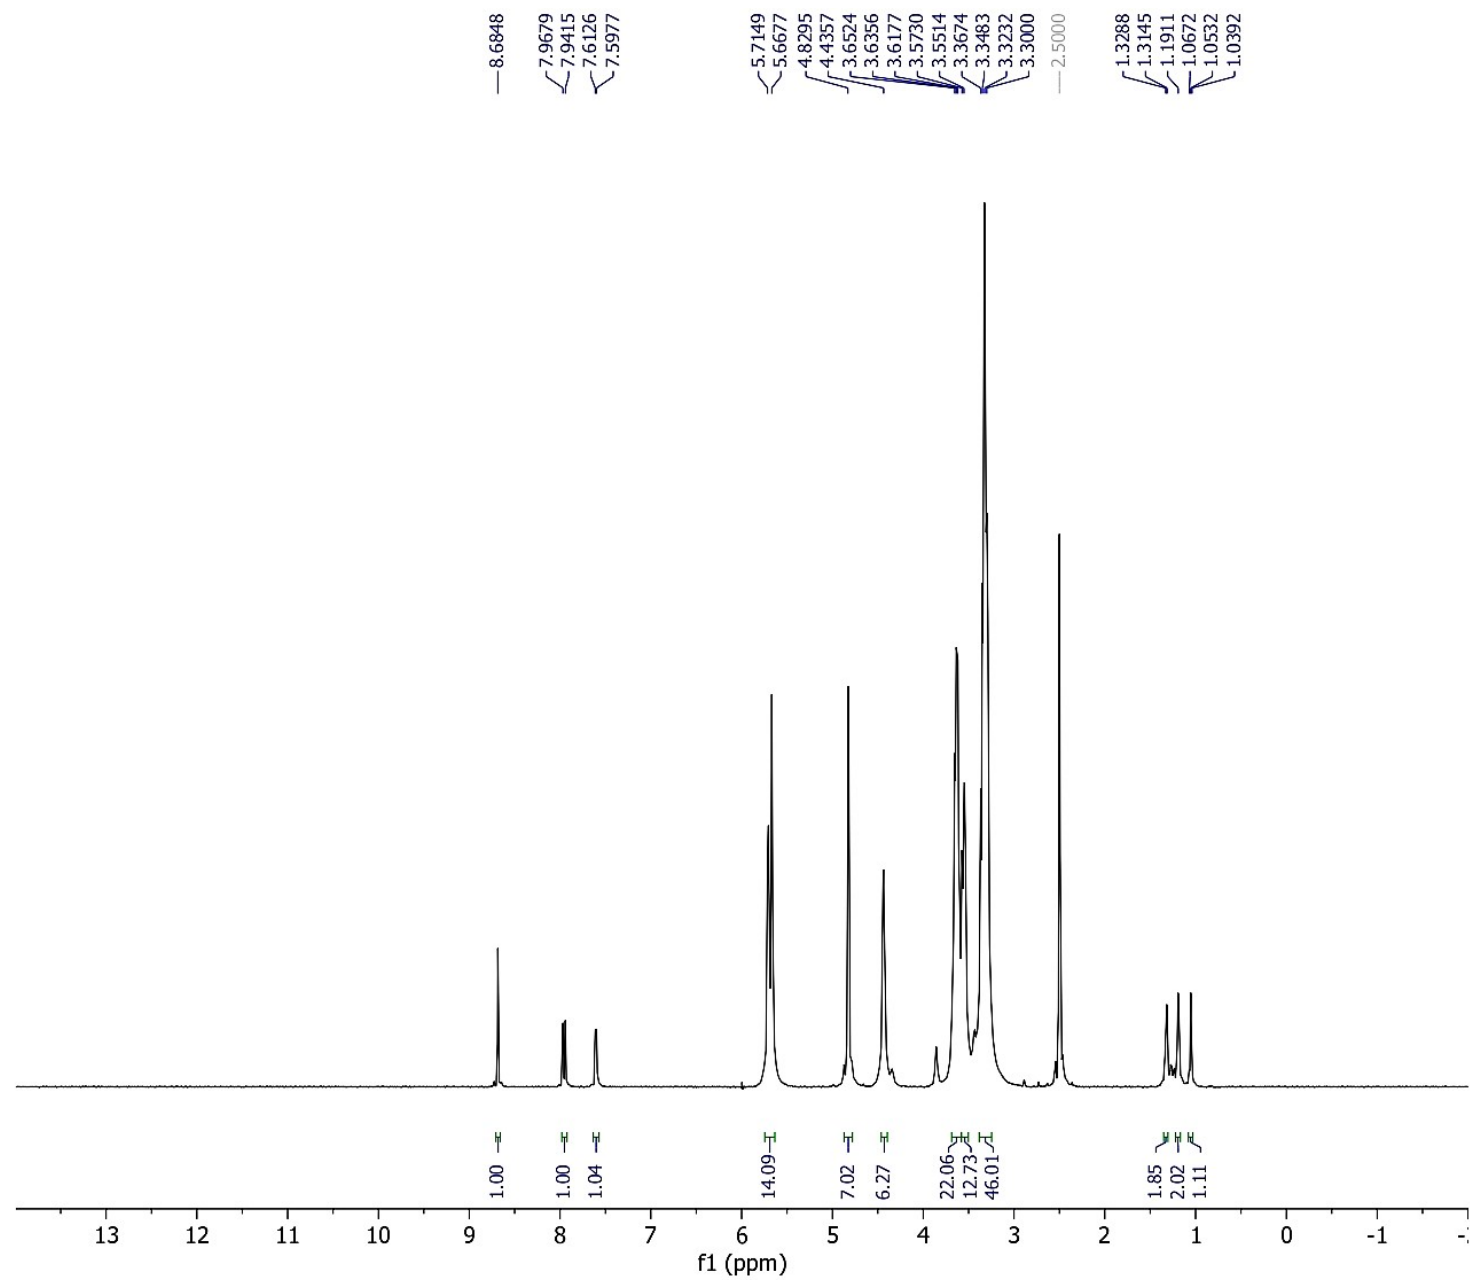

Figure S4. <sup>1</sup>H-NMR spectrum of CPFX/B-CD-MPS.

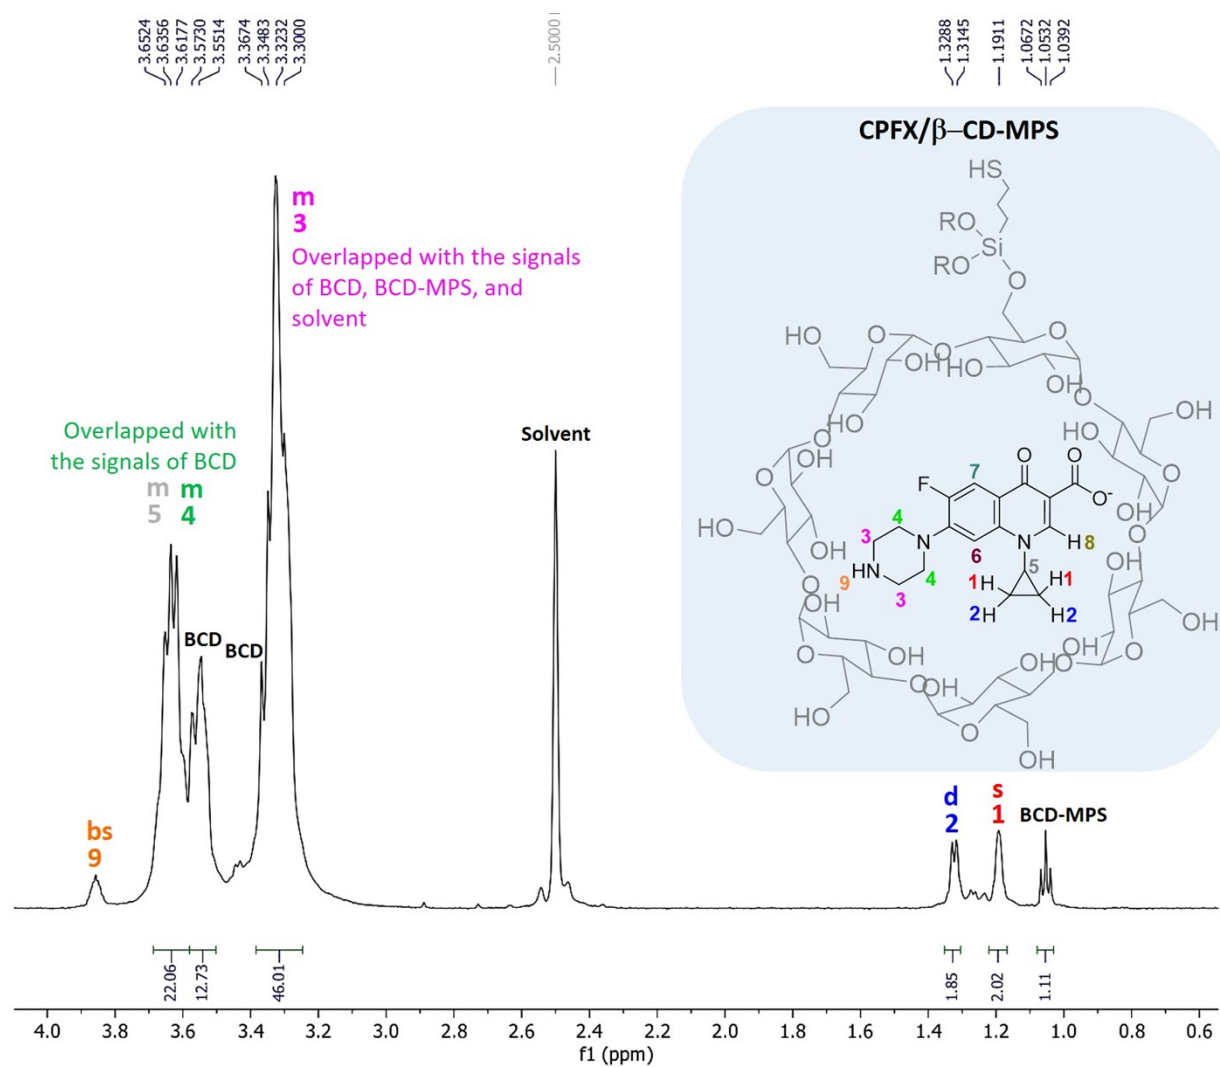

**Figure S5.** <sup>1</sup>H-NMR spectrum of CPIX/B-CD-MPS (expanded 0.6-4.0 ppm).

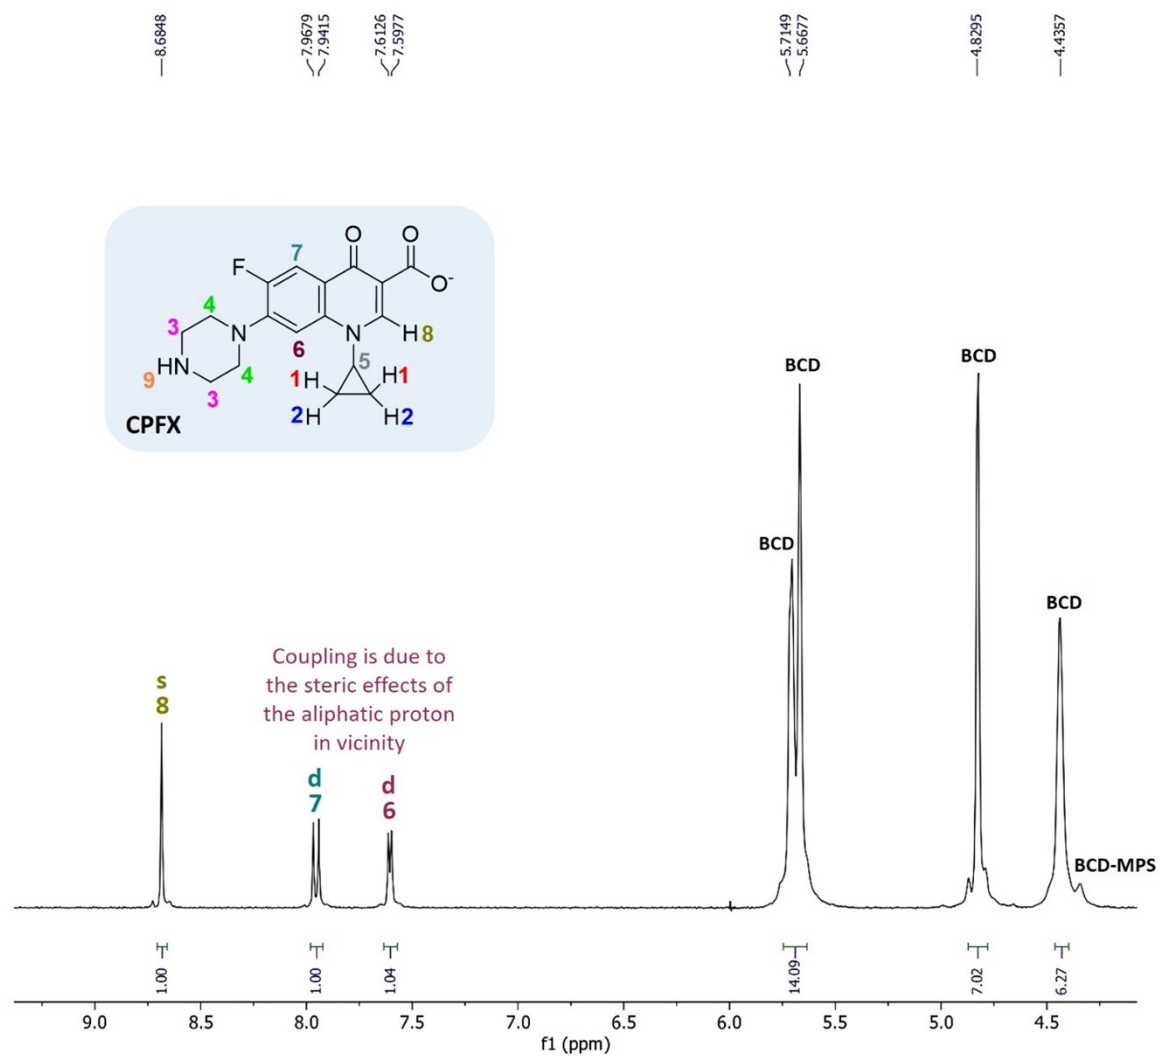

**Figure S6.**  $^1\text{H}$ -NMR spectrum of CPFY/B-CD-MPS (expanded 4.0-9.0 ppm).

Spectral data of CPFY/B-CD-MPS:

$^1\text{H}$  NMR (500 MHz, DMSO):  $\delta$  = 1.05 (t, 2H,  $J$  = 7.0 Hz,  $\text{SiCH}_2$ ), 1.19 (s, 2H,  $\text{CH}_2$  in CP ring), 1.31 (d, 2H,  $J$  = 7.0 Hz,  $\text{CH}_2$  in CP ring), 3.20-3.70 (m, 81H), 3.85 (bs, 1H,  $\text{CH}_2\text{NHCH}_2$ ), 4.30-4.50 (bs, 7H,  $\text{SH}$  and  $\text{CHOH}$  in BCD-MPS), 4.82 (bs, 7H,  $\text{CHOH}$  in BCD-MPS), 5.66 (bs, 7H,  $\text{CH}_2\text{OH}$  in BCD-MPS), 5.71 (d, 7H,  $\text{CHO}_2$  in BCD-MPS), 7.60 (d, 1H,  $J$  = 7.4 Hz,  $\text{ArH}$ ), 7.95 (d, 1H,  $J$  = 13.2 Hz,  $\text{ArH}$ ), 8.68 (s, 1H,  $\text{C}=\text{C}-\text{H}$ ).



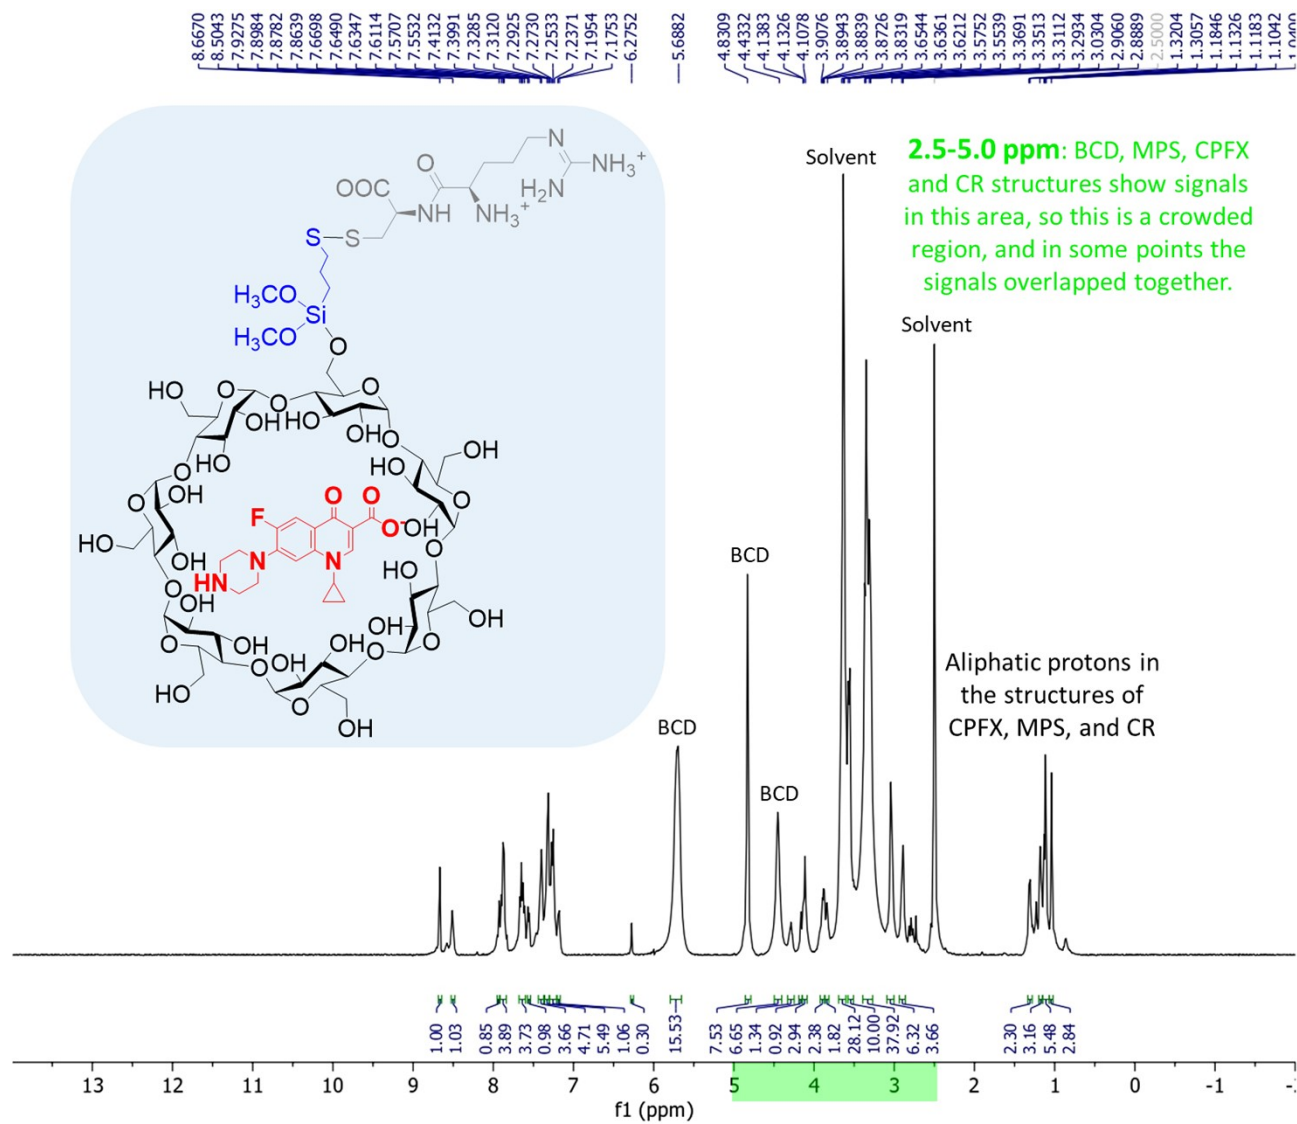

Figure S7. <sup>1</sup>H-NMR spectrum of CPFX/B-CD-CR.

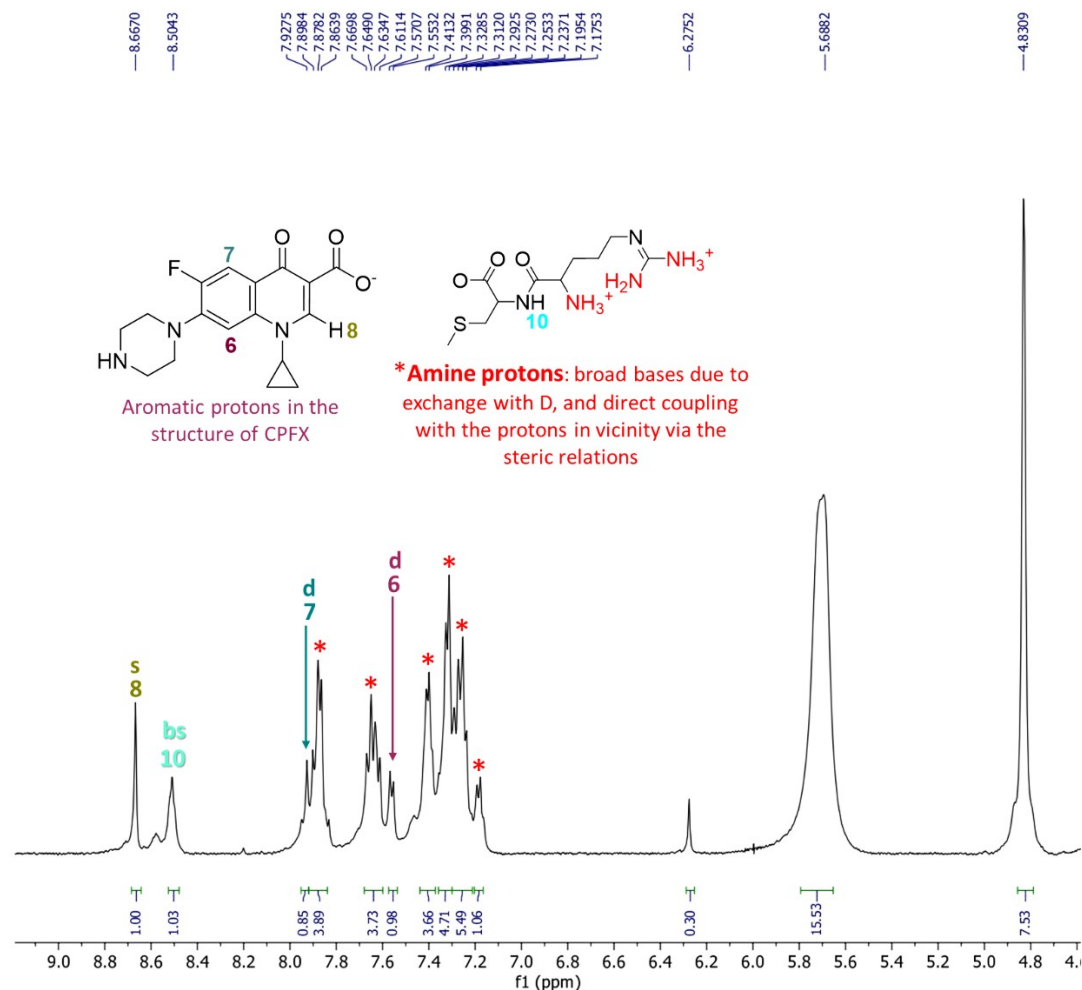

**Figure S8.**  $^1\text{H-NMR}$  spectrum of CPFX/B-CD-CR (expanded 4.6-9.0 ppm).

Spectral data of CPFX/B-CD-CR:

$^1\text{H NMR}$  (500 MHz, DMSO):  $\delta$  = 0.82-1.32 (m, 13H, Aliphatic H of BCD-MPS, CPFX, and CR), 2.88-4.13 (m, 93H, Aliphatic H of BCD-MPS, CPFX, and CR), 4.43 (s, 7H, BCD), 4.83 (s, 7H, BCD), 5.68 (bs, 15H, BCD), 7.17-7.41 (m, 15H, NH in Gn and alpha-amine of R), 7.4 (d, 1H, ArH in CPFX), 7.61-7.66 (q, 4H,  $J$  = 10 Hz, NH in Gn and alpha-amine of R), 7.86-7.89 (d, 4H,  $J$  = 5 Hz, NH in Gn and alpha-amine of R), 7.9 (d, 1H,  $J$  = 14.5 Hz, ArH in CPFX), 8.5 (bs, 1H, CONH in CR), 8.66 (s, 1H, ArH in CPFX).

## Supporting Information

NOTE: In all H-NMR spectra, there are a few bugs, which have been corrected in the reported spectral data. The mentioned bugs are as below;

1. In spectrum of the neat BCD; the integral value of the signal area of 3.2-3.4 ppm has not been estimated and marked on the spectrum. So, we marked that as integral 3H.
2. In spectrum of CPF<sub>X</sub>/B-CD-MPS (expanded 0.6-4.0 ppm); the integral value of the first signal (at 1.05 ppm, t) is misestimated, as it should be 2H. Also, a broad-base peak appeared at 3.85 ppm should be considered, as it can be assigned to the N-H (in piperazine ring).
3. In spectrum of CPF<sub>X</sub>/B-CD-MPS (expanded 4.0-9.0 ppm); the tiny peak appeared at ca. 4.35 ppm should be considered, as it was assigned to the thiol proton (-SH) in the spectrum of B-CD-MPS.
